# Supplementary material
Source: PubMed Central journal article supplement (PMC7175634)
Supplement: mmc1.pdf [file mmc1.pdf]

**Biophysical Journal, Volume 118**

**Supplemental Information**

**A Disorder-to-Order Transition Mediates RNA Binding of the *Caenorhabditis elegans* Protein MEX-5**

**Davide Tavella, Asli Ertekin, Hila Schaal, Sean P. Ryder, and Francesca Massi**

# **A disorder-to-order transition mediates RNA-binding of the *Caenorhabditis elegans* protein MEX-5**

Davide Tavella, Asli Ertekin, Hila Schaal, Sean P. Ryder and Francesca Massi

## **SUPPORTING INFORMATION**

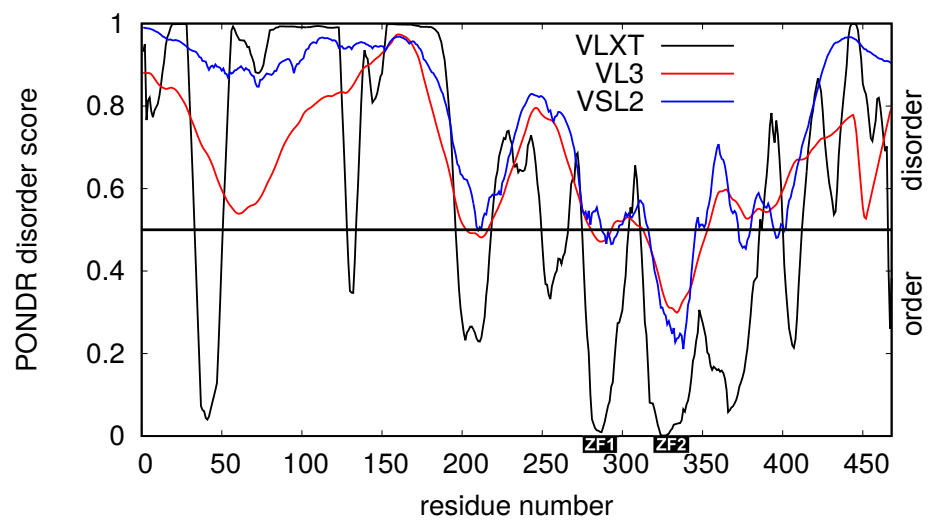

Figure S1: Disorder prediction of MEX-5 estimated using POND R<sup>®</sup>. For the three predictors VLXT, VSL2 and VL3, which evaluate the per residue disorder probability, scores above 0.5 correspond to the predicted disordered regions/residues, whereas scores below 0.5 correspond to predicted ordered regions/residues.

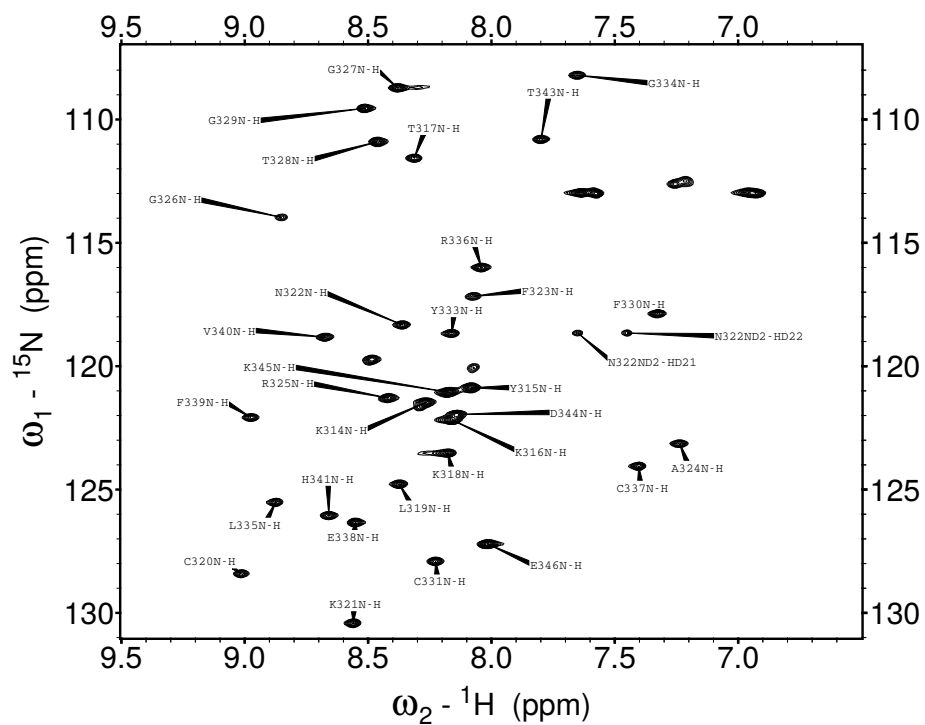

Figure S2:  $^{15}\text{N}$ - $^1\text{H}$  HSQC spectrum of MEX-5<sub>312-346</sub>, containing only ZF2. For each H-N backbone resonance, the corresponding amino acid residue is indicated.

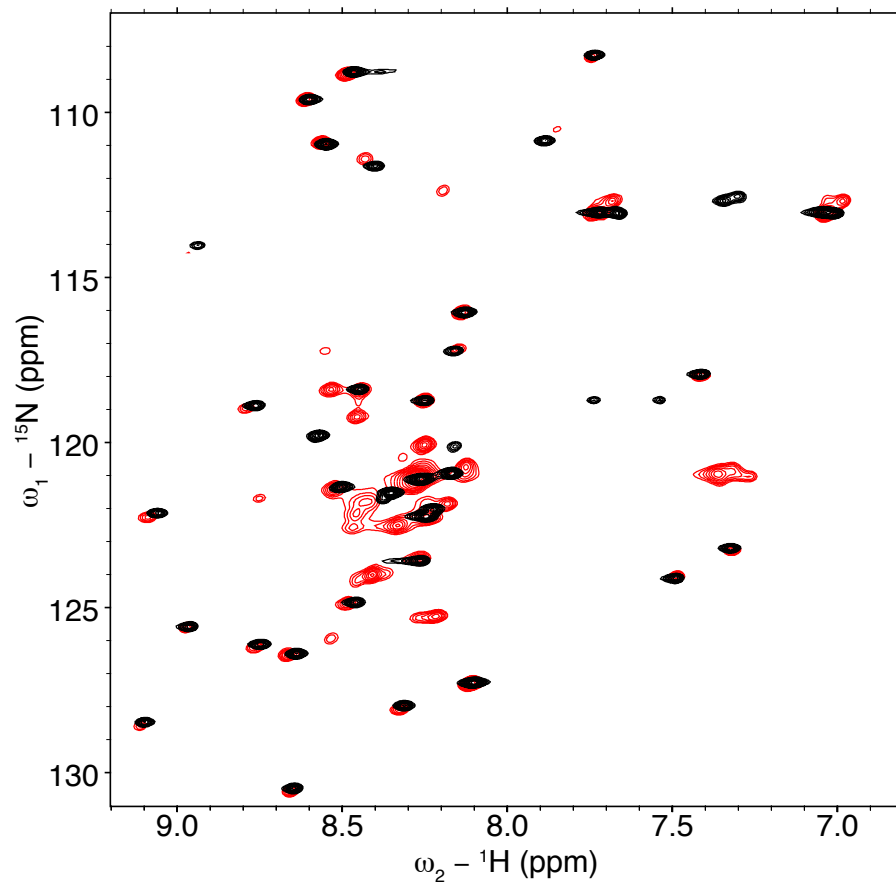

Figure S3: The  ${}^{15}\text{N}$ - ${}^1\text{H}$  HSQC spectrum of MEX-5<sub>312-346</sub> (black), containing only ZF2, has a similar number of cross-peaks and similar chemical shifts compared to the TZF domain (red).

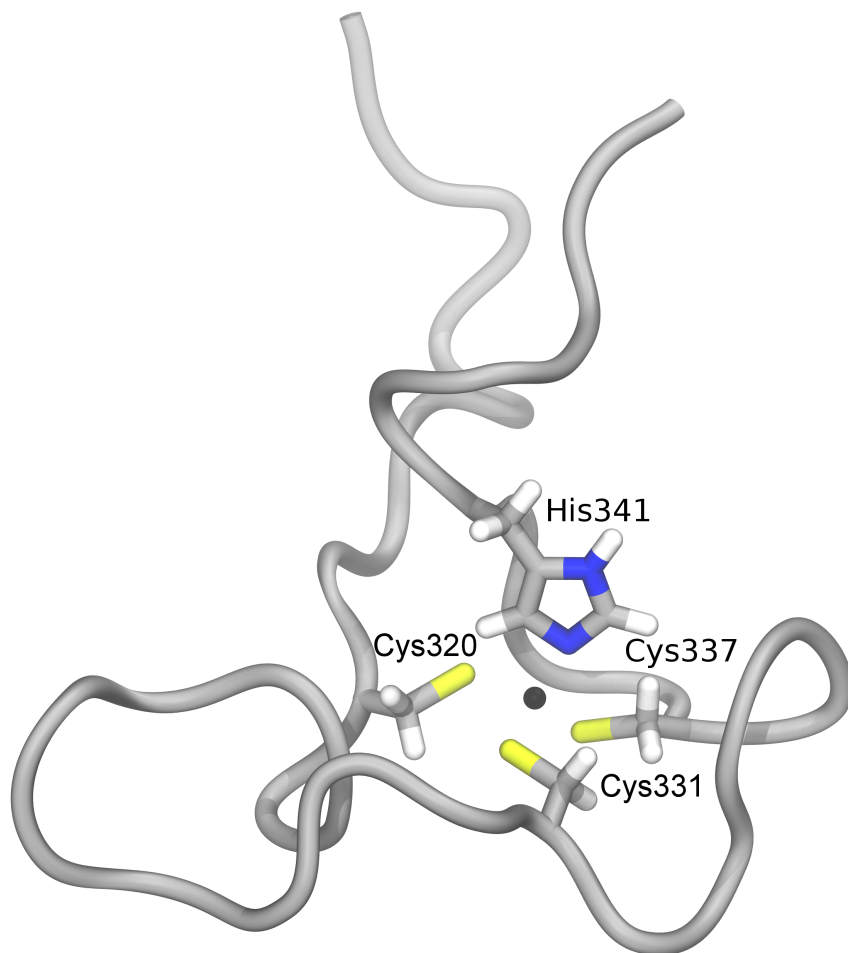

Figure S4: Solution structure of MEX-5 ZF2 showing the side chains of the zinc coordinating residues Cys 320, Cys 331, Cys 337 and His 341.

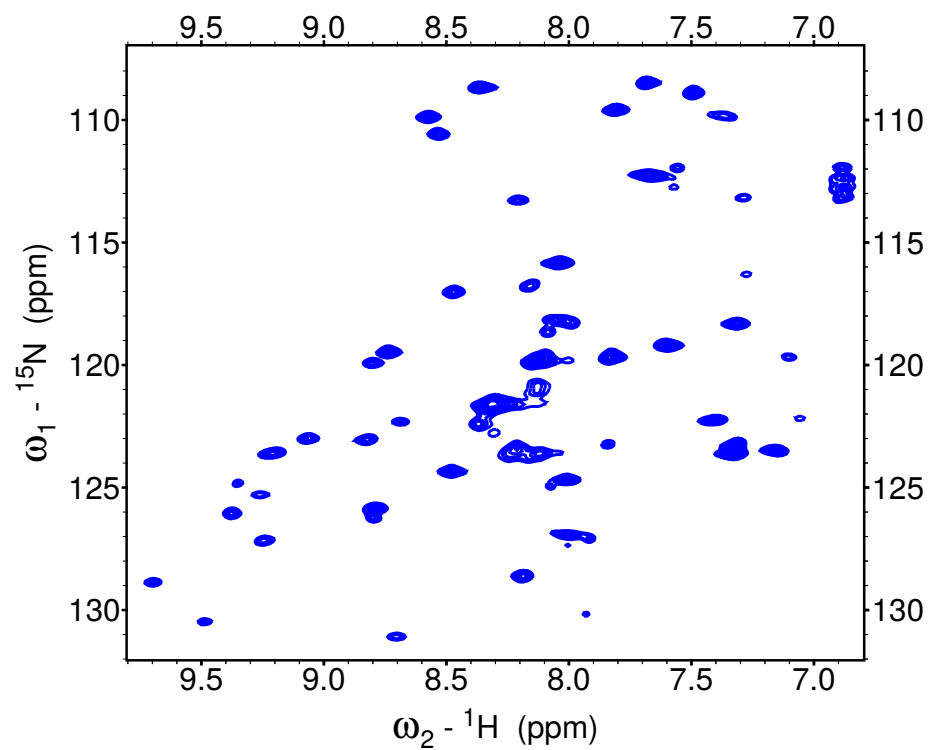

Figure S5: The  $^{15}\text{N}$ - $^1\text{H}$  HSQC spectrum of the TZF domain of MEX-5 bound to 5'-UUUUAUUUAUUUU-3' RNA exhibits more cross-peaks than the RNA-free spectrum.

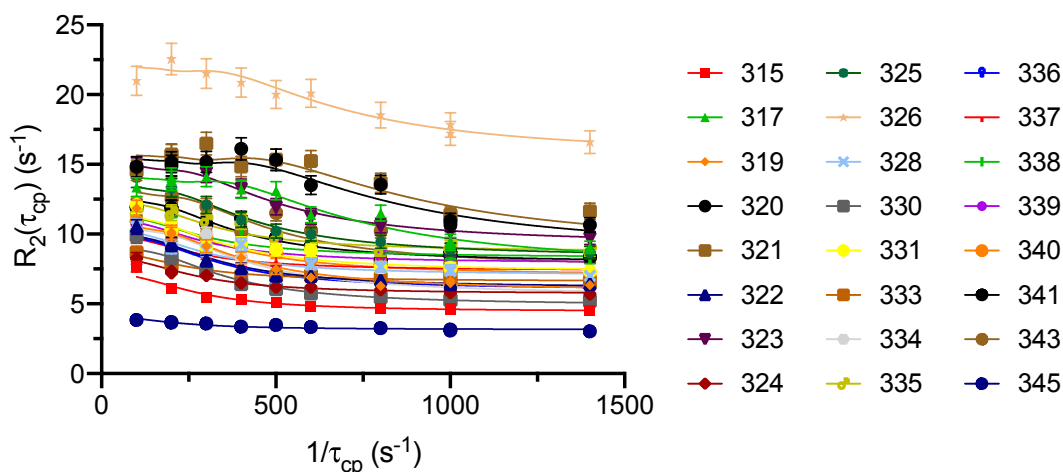

Figure S6: Chemical exchange for ZF2 of MEX-5.  $^{15}\text{N}$  relaxation dispersion profiles measured for the residues of ZF2 of MEX-5 at 293 K and at a static magnetic field of 14.1 T.  $^{15}\text{N}$  spin relaxation rate constants  $R_2$  were calculated from the monoexponential decay fit of the cross-peak intensities; uncertainties were estimated by jackknife simulations. The solid lines represent the best global fit of the data obtained by optimizing  $k_{\text{ex}}$ ,  $p_A$ ,  $\Delta\omega$  and  $R_2^0$  to the following equation  $R_2(\frac{1}{\tau_{\text{cp}}}) = R_2^0 + \frac{1}{2}(k_{\text{ex}} - \frac{1}{\tau_{\text{cp}}}) \cosh^{-1}(D_+ \cosh(\eta_+) - D_- \cos(\eta_-))$ , where  $D_{\pm} = \frac{1}{2}(\pm 1 + \frac{\psi + 2\Delta\omega^2}{(\psi^2 + \zeta^2)^{1/2}})^{1/2}$ ,  $\eta_{\pm} = \frac{\tau_{\text{cp}}}{\sqrt{2}}(\pm\psi + (\psi^2 + \zeta^2)^{1/2})^{1/2}$ ,  $\psi = k_{\text{ex}}^2 - \Delta\omega^2$ ,  $\zeta = -2\Delta\omega k_{\text{ex}}(p_A - p_B)$ ,  $k_{\text{ex}} = k_1 + k_{-1}$ , with  $\tau_{\text{cp}}$  being the delay between  $180^\circ$  pulses in the CPMG pulse train,  $p_A$  and  $p_B$  the populations of the two exchanging states A and B,  $\Delta\omega$  their chemical shift difference and  $k_1$  and  $k_{-1}$  the forward and reverse rate constants, respectively. The data was globally fitted as all residues shared the same  $k_{\text{ex}}$  and  $p_A$  values but different values of  $\Delta\omega$  and  $R_2^0$ . From the global fit we obtained  $k_{\text{ex}} = 640 \pm 50 \text{ s}^{-1}$  and  $p_A = 0.989 \pm 0.001$ .



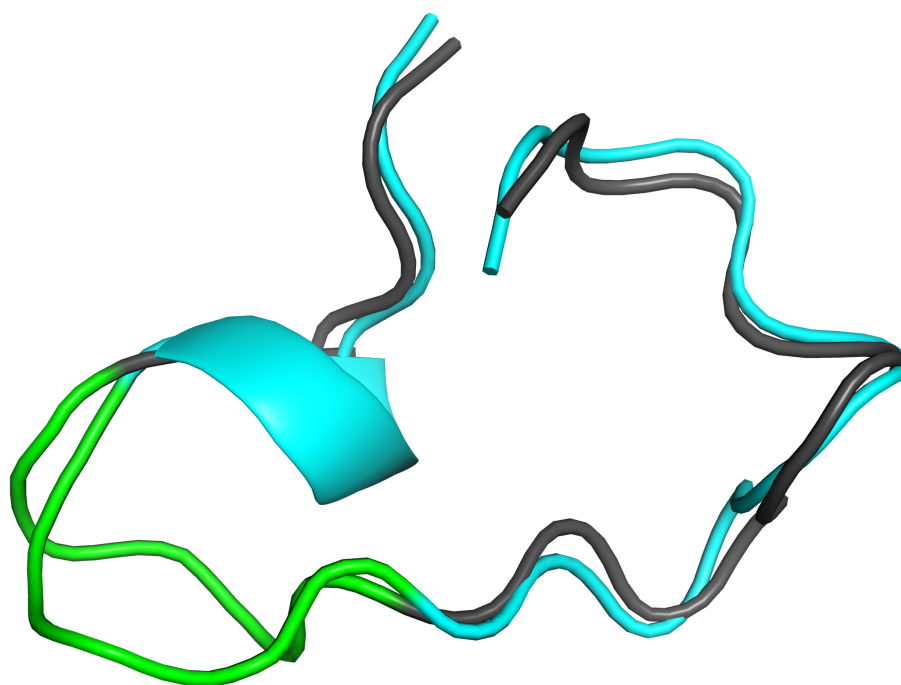

Figure S7: Overlay of the structure of ZF2 determined with NMR spectroscopy (cyan) and from a snapshots taken from the MD trajectory of MEX-5 (gray). The flexible glycine rich region (residues 325-329) is highlighted in green.

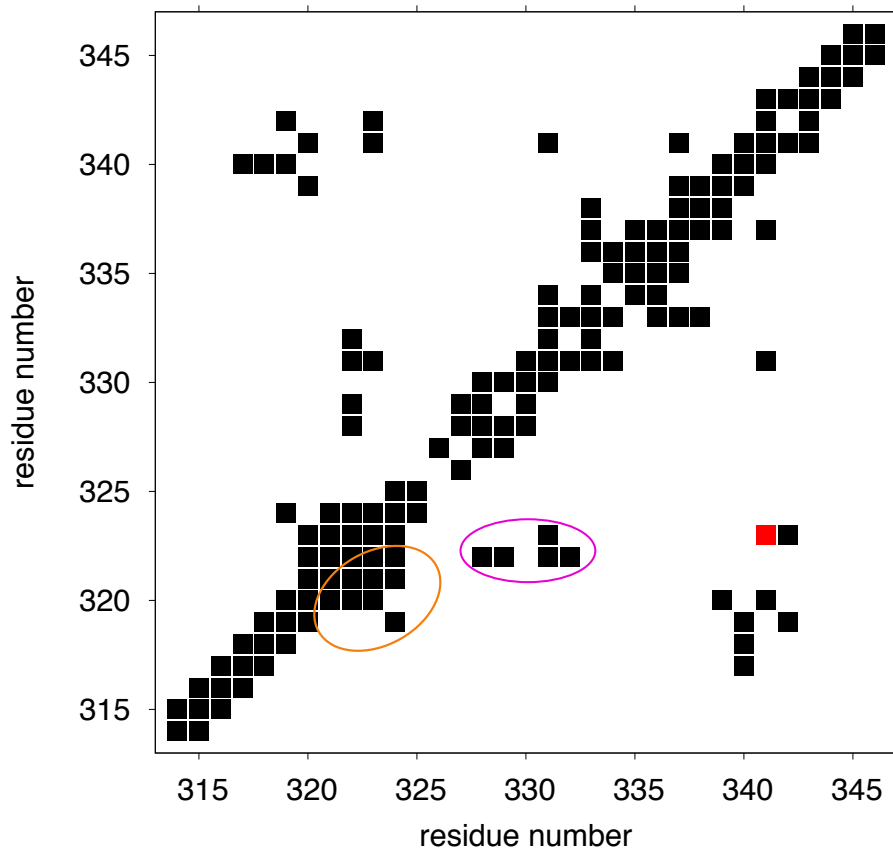

Figure S8: Plot illustrating the contact map calculated from the distance restraints, based on NOE resonances, generated by CYANA. The contact corresponding to the NOE between atoms Phe323-H<sup>δ</sup> and His341-H<sup>δ2</sup> is indicated as a red square. Contacts corresponding to NOEs between the residues in the 321-324 region and between Asn322 and the residues in the 328-332 region are highlighted using orange and purple circles, respectively.

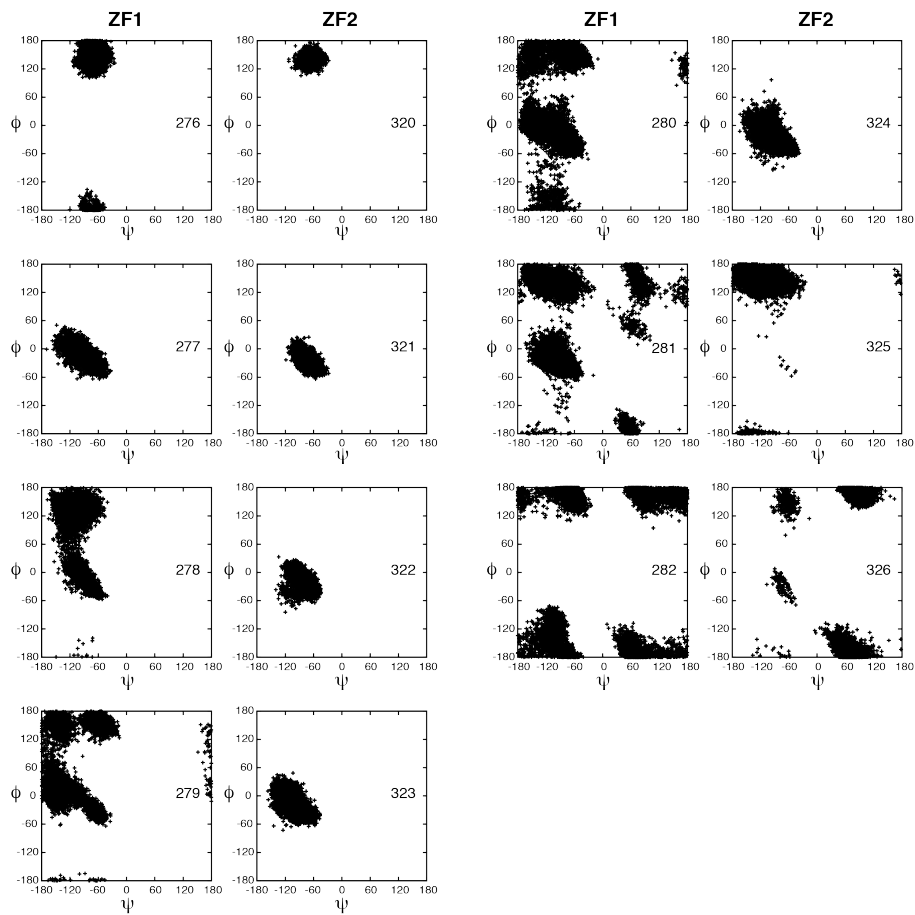

Figure S9: Backbone dihedral angles,  $\phi$  and  $\psi$ . **A.** Backbone dihedral angles,  $\phi$  and  $\psi$ , are plotted for corresponding residues located between the first and second cysteine residues in ZF1 and ZF2. The residue number is indicated on each plot.

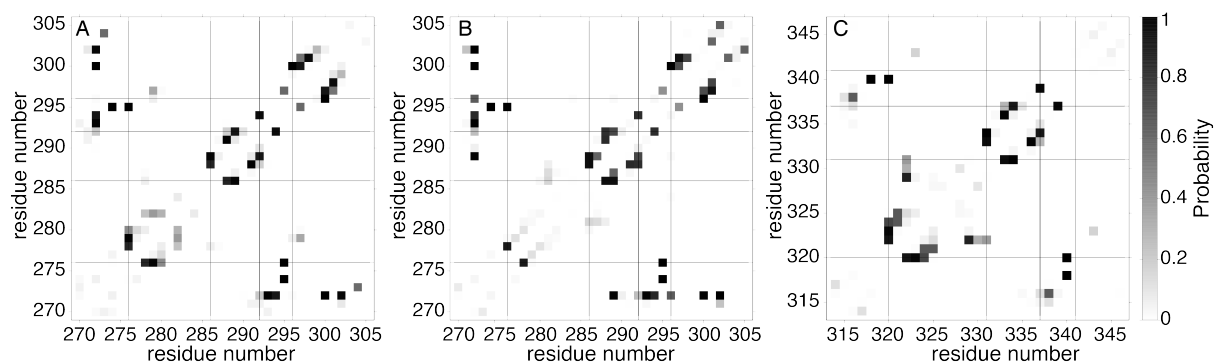

Figure S10: Hydrogen bond probabilities calculated for the residues of ZF1 and ZF2 of MEX-5. **A.** Hydrogen bond probabilities of ZF1 calculated using only the conformations of ZF1 where the side chain of H296 is stacked against the side chain of H279. **B.** Hydrogen bond probabilities of ZF1 calculated using the conformations of ZF1 where there is no stacking between the side chains of H296 and of H279. **C.** Hydrogen bond probabilities of ZF2.

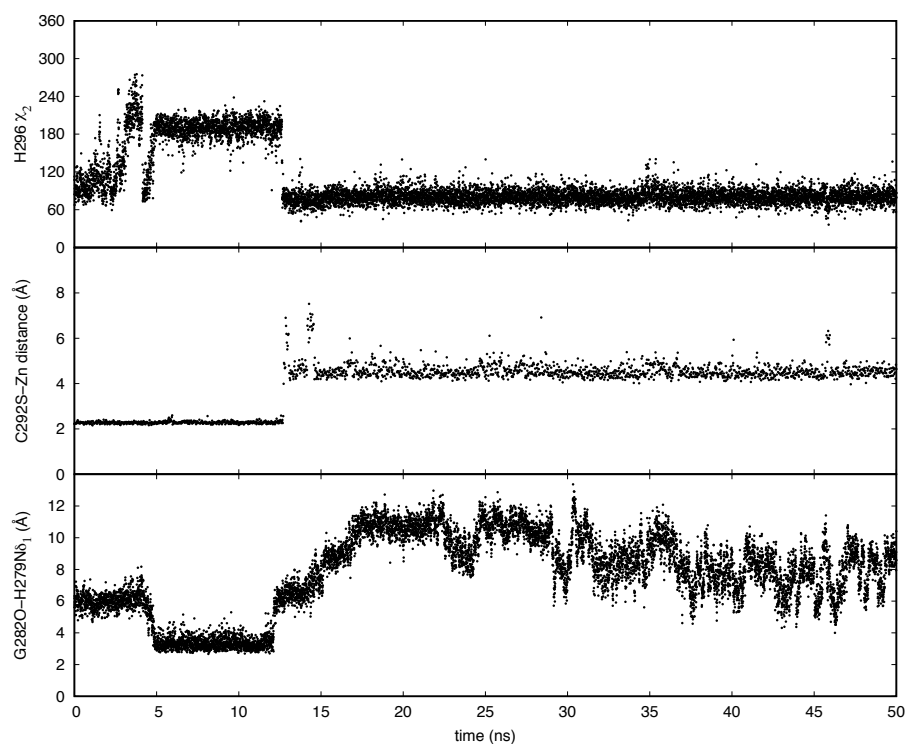

Figure S11: Plots illustrating the loss of  $\text{Zn}^{2+}$  coordination from ZF1 following the loss of the stacking interaction between H279 and H296. The  $\chi_2$  dihedral angle of the zinc-coordinating H296 (top panel), C292S –  $\text{Zn}^{2+}$  distance (middle panel) and H279N $\delta_1$  – G282O distance (bottom panel) are shown as functions of time. Stacking between the side chain of H279 and H296 occurs between 5 ns and 12 ns and maintains the H296  $\chi_2$  dihedral angle to  $\approx 180^\circ$  (top). H279-H296 side chain stacking is facilitated by the formation of a hydrogen bond between the side chain of H279 and that of G282 (bottom). Loss of H279-H296 side chain stacking is followed by the loss of  $\text{Zn}^{2+}$  coordination (middle). Data are shown for one of the three MD trajectories of MEX-5.

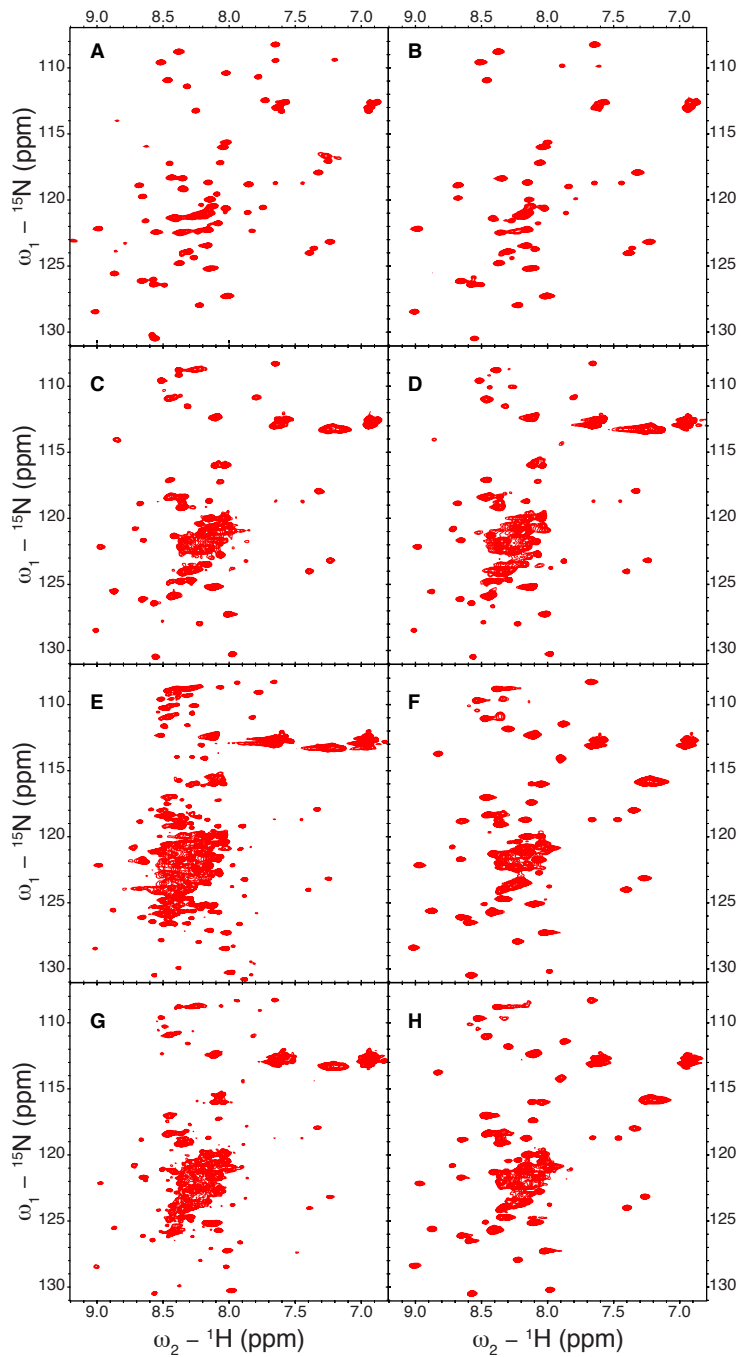

Figure S12: The TZF domain of MEX-5 mutants is not folded in the RNA-free state. The  $^{15}\text{N}$ - $^1\text{H}$  HSQC spectra of MEX-5 mutants from table 2: **A**:CMMFASGIKPC, **B**:CMMHASGIKAC, **C**: CMMHASGGIKPC, **D**: CMMHASGAIKPC, **E**: CMMHASGGIGPC, **F**: CMMHASGGTGPC, **G**: CMNHASGGIKPC, **H**: CMNHASGGIGPC. In panels E and G, the cluster of overlapped peaks in the middle of the spectra indicate aggregation.

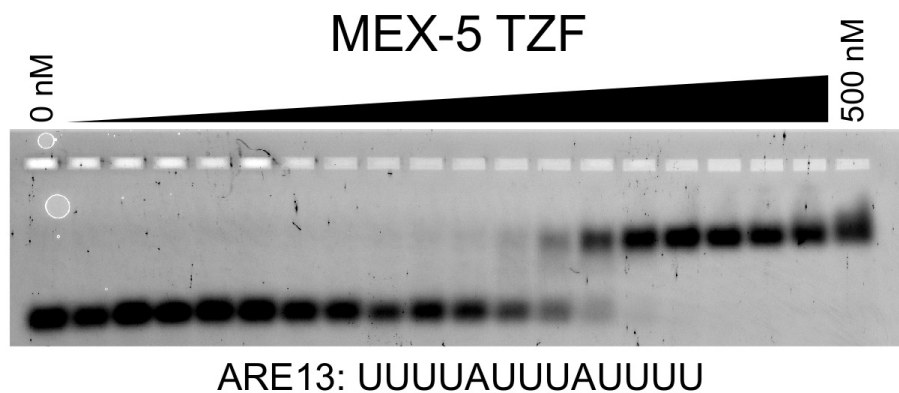

| RNA sequence   | MEX-5 TZF | MEX-5 <sub>CX10C</sub> TZF |
|----------------|-----------|----------------------------|
| UUUUAUUUAUUUU  | 15±1 nM   | 9±1 nM                     |
| UUUUUUUUUUUUUU | 136±7 nM  | 154±4 nM                   |
| UUUUUUUUUAUUUU | 62±4 nM   | 77±6 nM                    |
| UUUUAUUUUUUUUU | 26±3 nM   | 48±5 nM                    |

Figure S13: The TZF domains of MEX-5 and MEX-5<sub>CX10C</sub> bind to the same targets with similar affinity. On top: the interaction of MEX-5 with ARE13 RNA as measured by EMSA. On bottom: The  $K_{d,app}$  and the fit error of the two proteins are shown for the four RNA sequences.

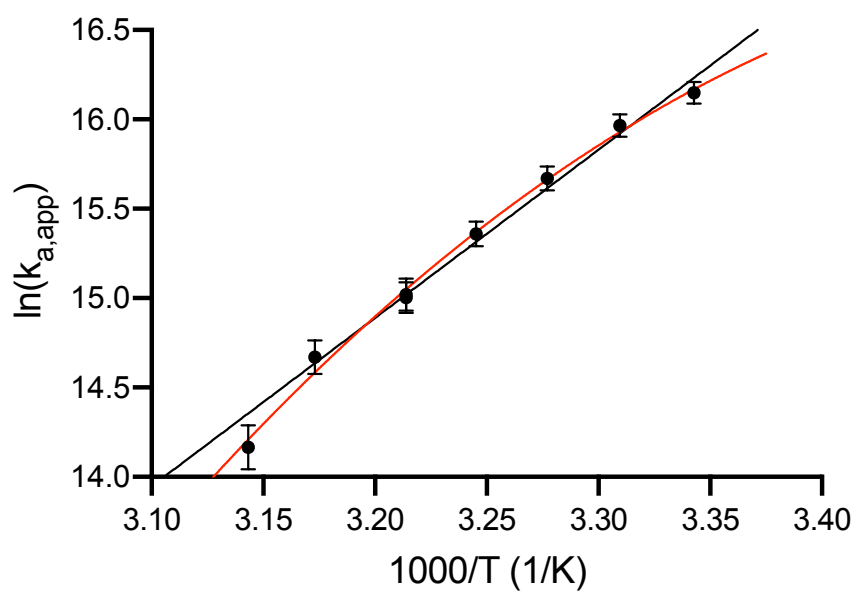

Figure S14: van't Hoff plot of  $\ln K_{a,app}$  as a function of  $1/T$  measured for the TZF domain of MEX-5 with ARE13 RNA using fluorescence polarization. Bars represent the uncertainties propagated from the standard errors of the fits of  $K_{d,app}$ . The best fit of the data obtained from the linear fit (with  $\Delta H = -18.7 \pm 0.9$  Kcal mol<sup>-1</sup> and  $\Delta S = -0.030 \pm 0.003$  Kcal mol<sup>-1</sup> K<sup>-1</sup>) and from a three parameter fit (with  $\Delta H = -13 \pm 2$  Kcal mol<sup>-1</sup>,  $\Delta S = -0.010 \pm 0.006$  Kcal mol<sup>-1</sup> K<sup>-1</sup> and  $\Delta C_p = -0.7 \pm 0.2$  Kcal mol<sup>-1</sup> K<sup>-1</sup> at a reference temperature of 298.15 K) are shown in black and red, respectively.
